# Supplementary material
Source: PubMed Central journal article supplement (PMC4387093)
Supplement: NIHMS655032-supplement-2.pdf [file NIHMS655032-supplement-2.pdf]

**Supplementary Material for**  
**“Quantile rank maps: a new tool**  
**for understanding individual brain development”**  
**by Chen, Kelly, Castellanos, He, Zuo and Reiss**

**Appendix A. Critical value for the simulations**

Asymptotically, under the null hypothesis of no group difference,  $\sqrt{n}D_n$  has the same distribution as  $\sup_{\tau \in [0,1]} |B(\tau)|$  where  $B(\cdot)$  is the Brownian bridge (Bhattacharya and Waymire, 1990). But as noted in the text, it is necessary to obtain a recalibrated K-S critical value. To do this for simulated data based on the ABIDE data, we followed a modified version of the resampling procedure described in the “Recalibrated Kolmogorov-Smirnov test for group differences” section of the main text:

1. We randomly chose  $M = 100$  of the 6216 edges (pairs of ROIs) for the ABIDE data set.
2. For  $m = 1, \dots, M$ , for  $p = 1, \dots, P = 100$ :
  - (a) We chose quantiles  $\tau_1^{(mp)}, \dots, \tau_{735}^{(mp)}$  by independent draws from the Uniform(0, 1) distribution.
  - (b) A simulated “null” data set (i.e., with no group difference)  $y_1^{(mp)}, \dots, y_{735}^{(mp)}$  was generated by substituting the observed ages  $t_1, \dots, t_{735}$ , the random quantiles  $\tau_1^{(mp)}, \dots, \tau_{735}^{(mp)}$ , and  $\hat{\mu}_m(\cdot), \hat{\sigma}_m(\cdot), \hat{\nu}_m(\cdot)$  (i.e., the estimated age-varying distribution of functional connectivity for the  $m$ th edge, previously obtained from the real-data control group) into equation (6).

(c) Treating  $y_1^{(mp)}, \dots, y_{391}^{(mp)}$  as the “typical group” data and  $y_{392}^{(mp)}, \dots, y_{735}^{(mp)}$  as the “atypical group” data, we fitted the LMS model (2) to the former data and used the result to compute the K-S statistic  $D^{(mp)}$  for the latter.

3. The 95th percentile of  $\{D^{(mp)} : m = 1, \dots, M, p = 1, \dots, P\}$  was used as the critical value for rejection at level .05.

## Appendix B. Generating simulated data

To evaluate the performance of the recalibrated K-S test in the “linear” case, we randomly chose 20 edges for which the real-data control group quantile curves (see Figure A1) were approximately linear. For each edge we generated 250 replicates for  $\delta = 0$  (5000 replicates in total), and 50 replicates for each  $\delta > 0$  (1000 in total). For each replicate we drew a set of random quantiles as in step 2a of Appendix A; then simulated data as in step 2b, but with random deviations added to the “atypical” data (the last 344 responses), as described in the main text; and finally computed the K-S statistic as in step 2c. Type-I error rates and power estimates were based on comparing these K-S statistics with the critical value. This entire procedure was repeated with 20 randomly chosen edges for which the real-data control group quantile curves were markedly nonlinear (see Figure A2).

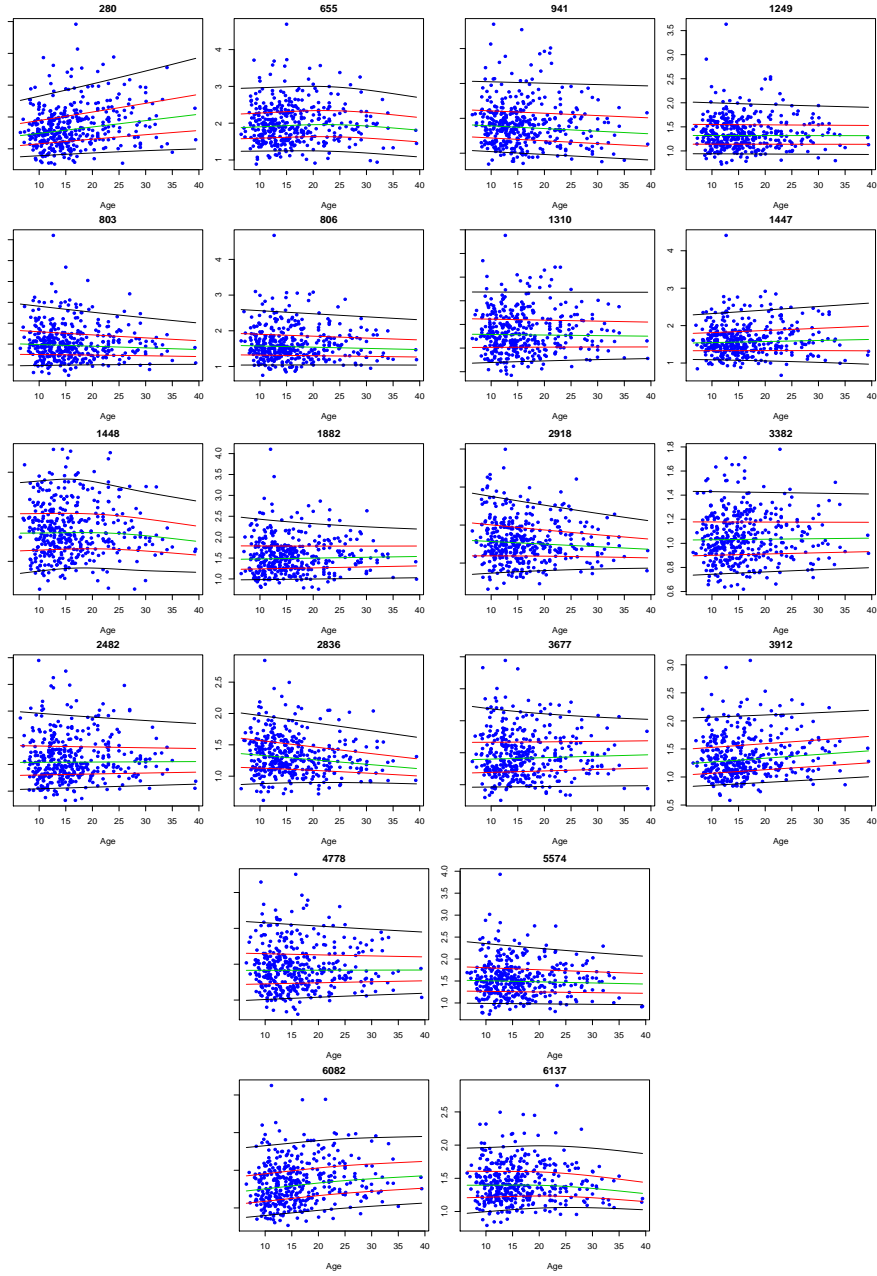

Figure A1: iFC data and estimated quantile curves for the ABIDE control group at 20 randomly selected edges for which the curves are approximately linear.

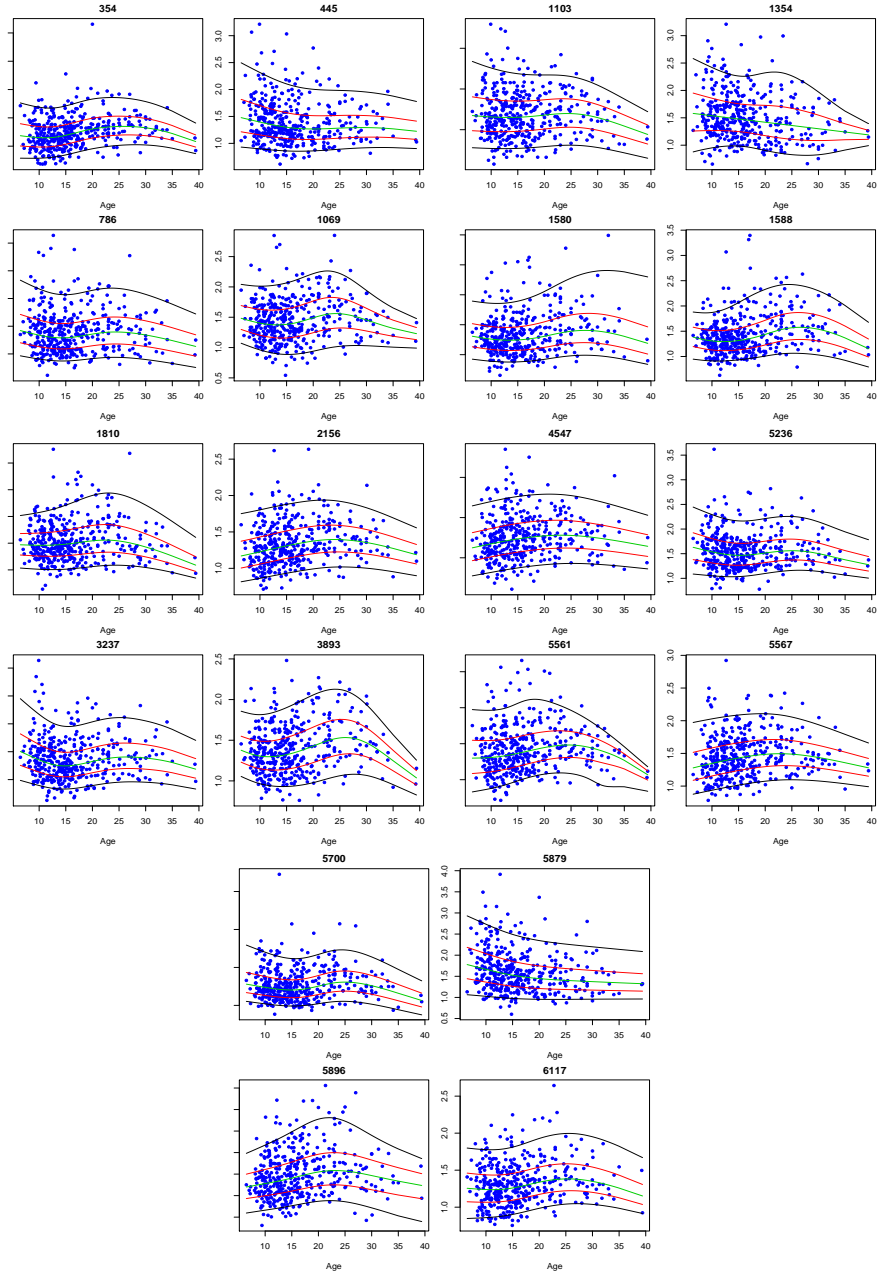

Figure A2: iFC data and estimated quantile curves for the ABIDE control group at 20 randomly selected edges for which the curves show noticeable nonlinearity.
